# Supplementary material for: Circular dichroism of multi-component assemblies for chiral amine recognition and rapid ee determination
Source: Royal Society of Chemistry journal article supplement (doi:10.1039/c1sc00496d), 2011-09-22
Supplement: c1sc00496d.pdf [file c1sc00496d.pdf]

## Supporting Information

### **Circular Dichroism of Multi-Component Assemblies for Chiral Amine Recognition and Rapid *Ee* Determination**

**Pedro Metola, Eric V. Anslyn,\* Tony D. James\* and Steven D. Bull\***

#### **Materials and Methods**

All reagents and solvents were used as purchased from commercial sources. The program used to carry out principal component analysis (PCA) and linear discriminant analysis (LDA) studies was XLSTAT 20011. <sup>1</sup>H-NMR and <sup>13</sup>C-NMR spectra were recorded on a Varian Mercury 400 MHz spectrometer. All CD measurements were performed at 25°C on a Jasco J-815 circular dichroism spectropolarimeter using a 0.1 cm cuvette.

#### **Experimental:**

4 mM stock solutions of FPBA, BINOL and derivatives and all  $\alpha$ -chiral primary amines (MBA, CHEA, AH, NEA, DMBA, and IPCA) were prepared by stirring the appropriate mass or volume in HPLC grade acetonitrile. All CD spectra were collected after a dilution step to make all samples 0.4 mM, with the 3-component assembly being prepared by mixing 100  $\mu$ L of the FPBA, BINOL-type species and amine stock solutions and adding HPLC grade acetonitrile until achieving volumes of 1 mL. The titration experiments were performed by measuring the CD signal for a collection of samples of 0.4 mM in FPBA and BINOL and varying concentrations of the amine. The solutions of known *ee*% were prepared by mixing the appropriate amounts of enantiopure amines and the *ee*% values used for the final error determination calculated accordingly.

### Characterization data

**(S)-BINOL + FPBA + (R)-AH assembly product:**  $^1\text{H-NMR}$  (400MHz,  $\text{CDCl}_3$ )  $\delta$  8.8 (s, 1H), 8.5 (d, 2H), 8.1 (d, 2H), 7.9 (m, 3H), 7.6 (m, 7H), 7.1 (d, 2H), 3.4 (m, 1H), 1.7 (m, 2H), 1.4 (m, 5H), 1.3 (m, 4H), 0.9 (t, 3H);  $m/z$  (ESI-MS) 495.5  $[\text{M}]^+$ .

### Supplementary Figures

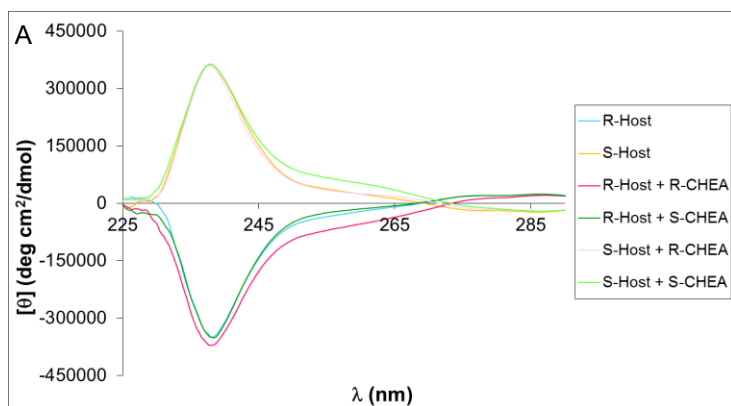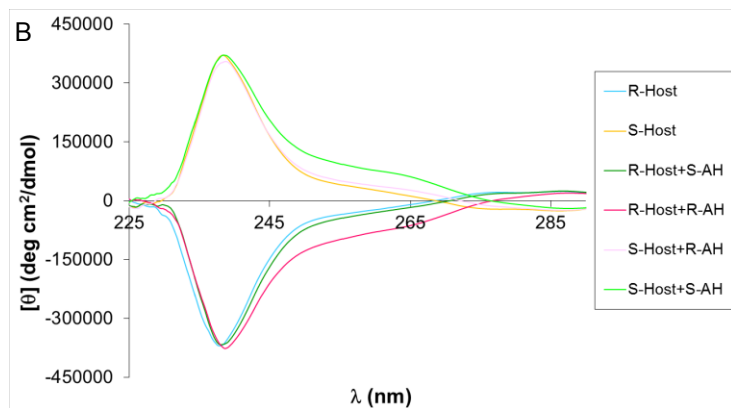

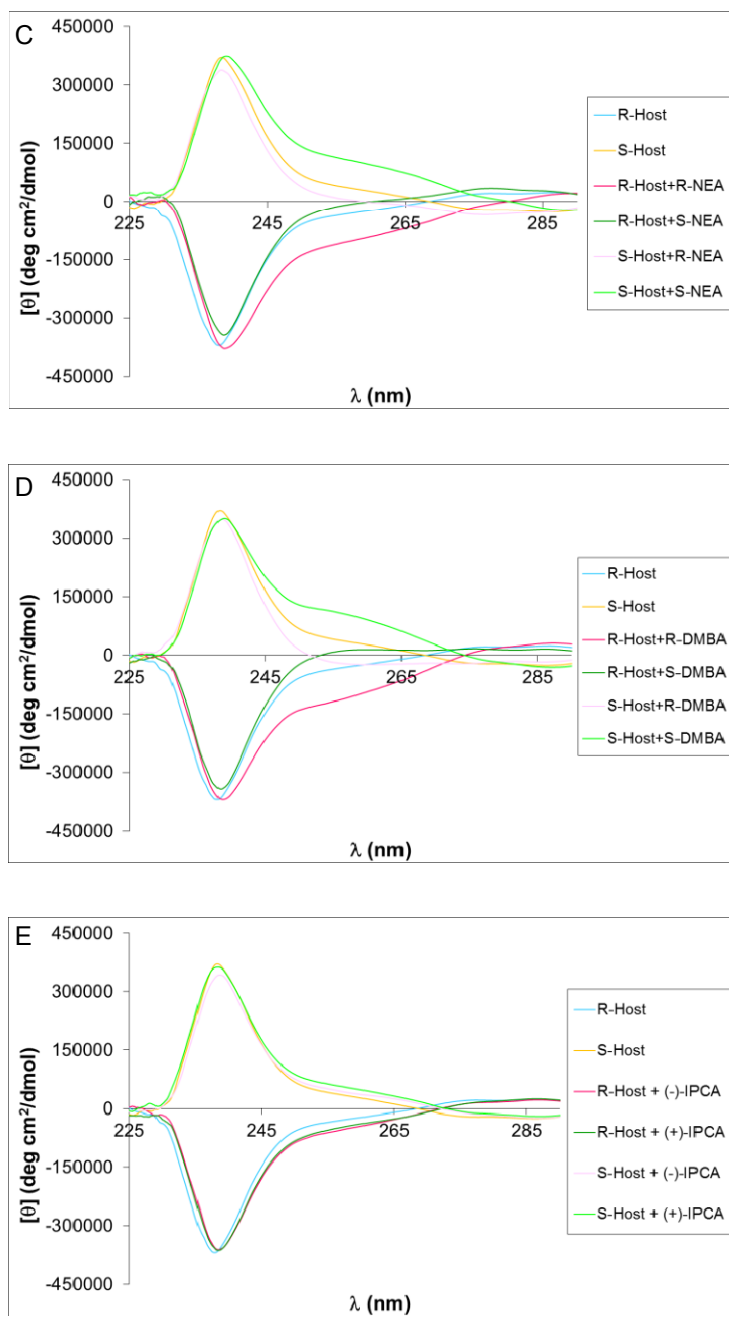

**Figure S1.** CD spectra for the assembly of BINOL, FPBA and A) CHEA, B) AH, C) NEA, D) DMBA and E) IPCA

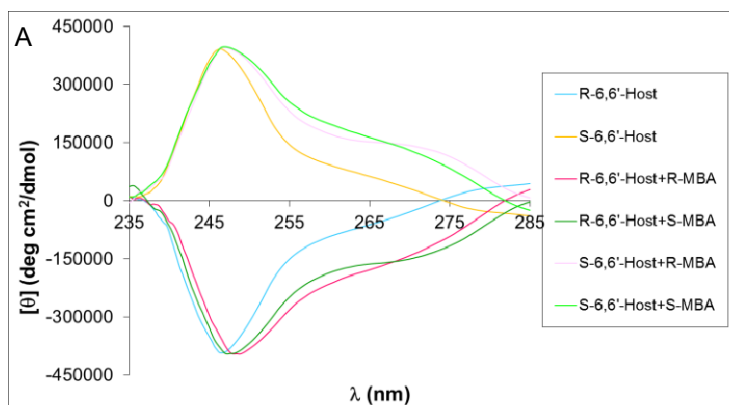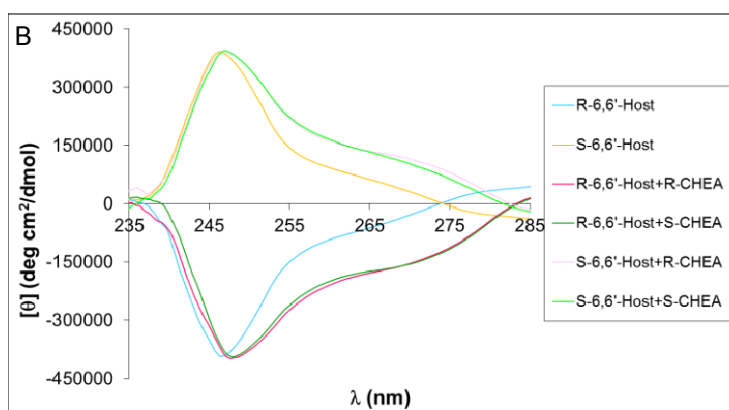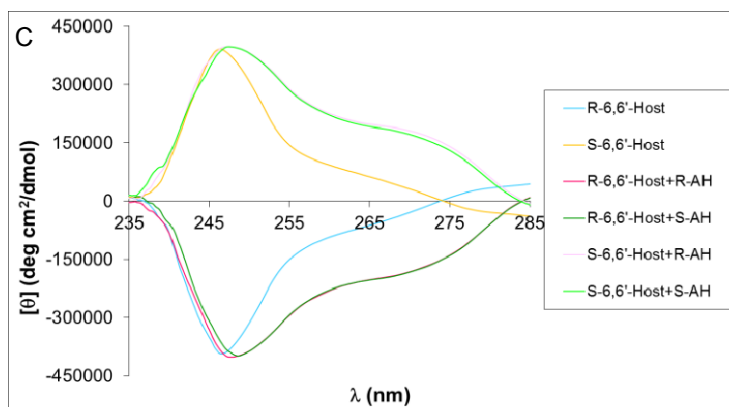

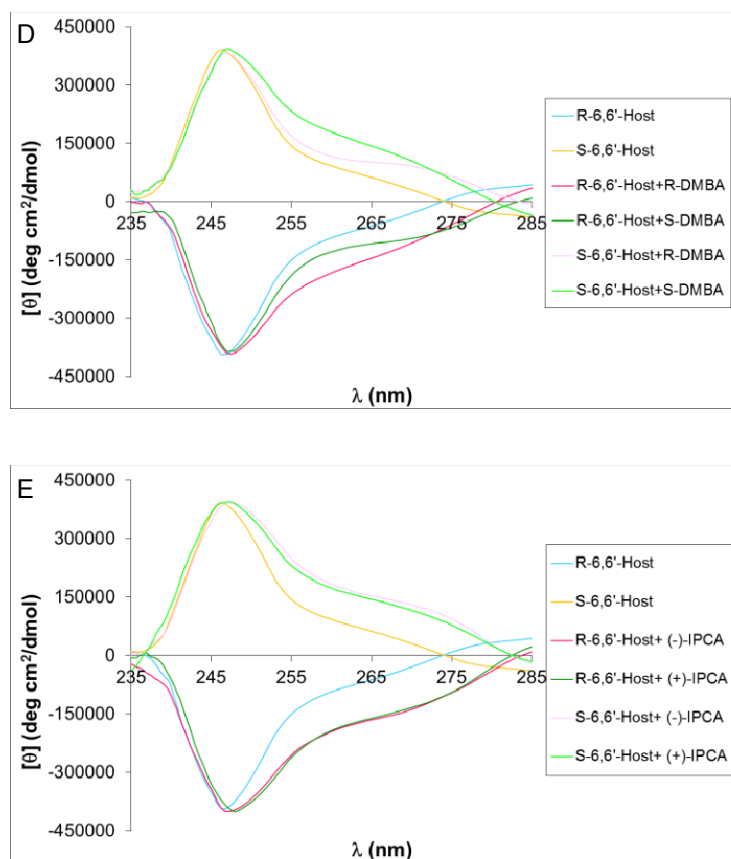

**Figure S2.** CD spectra for the assembly of 6,6'-DibromoBINOL, FPBA and A) MBA, B) CHEA, C) AH, D) DMBA and E) IPCA

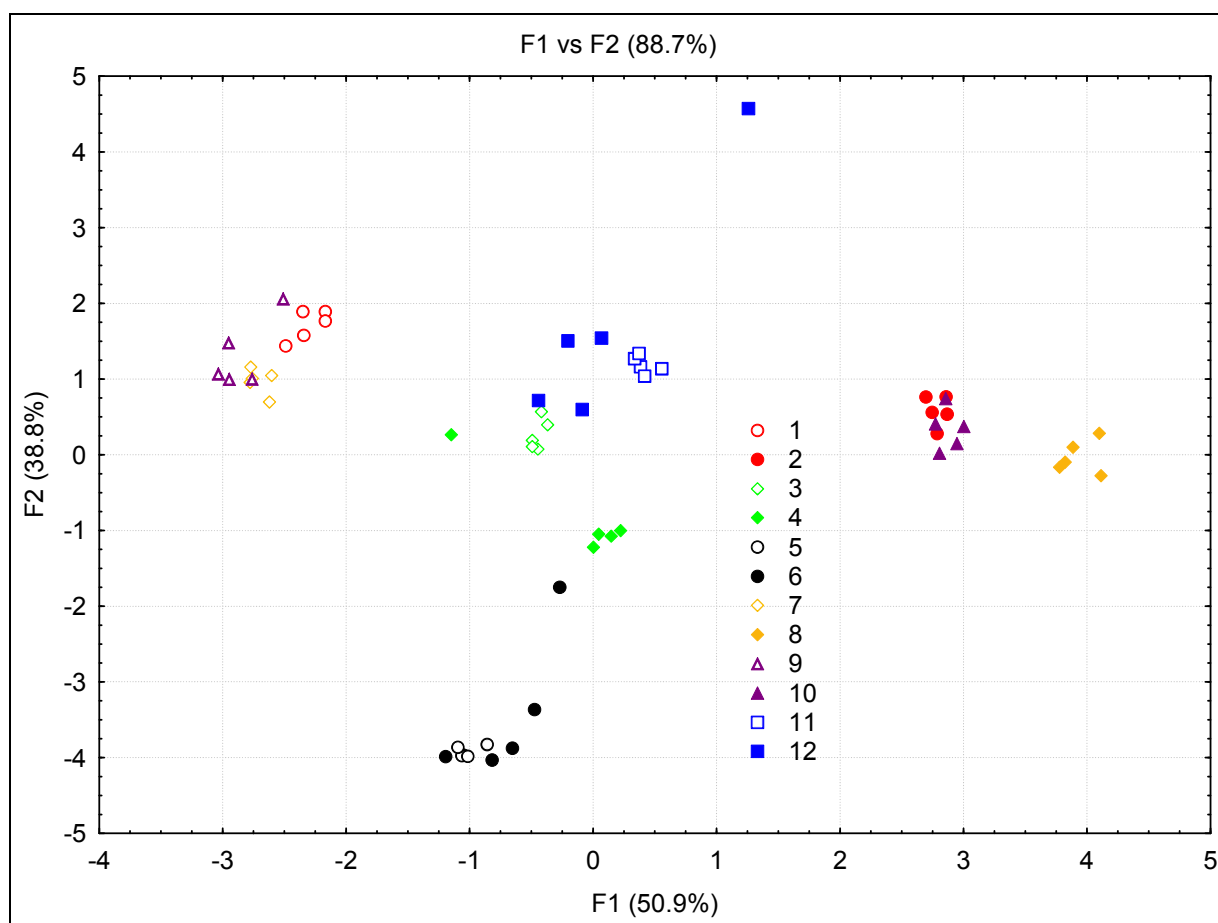

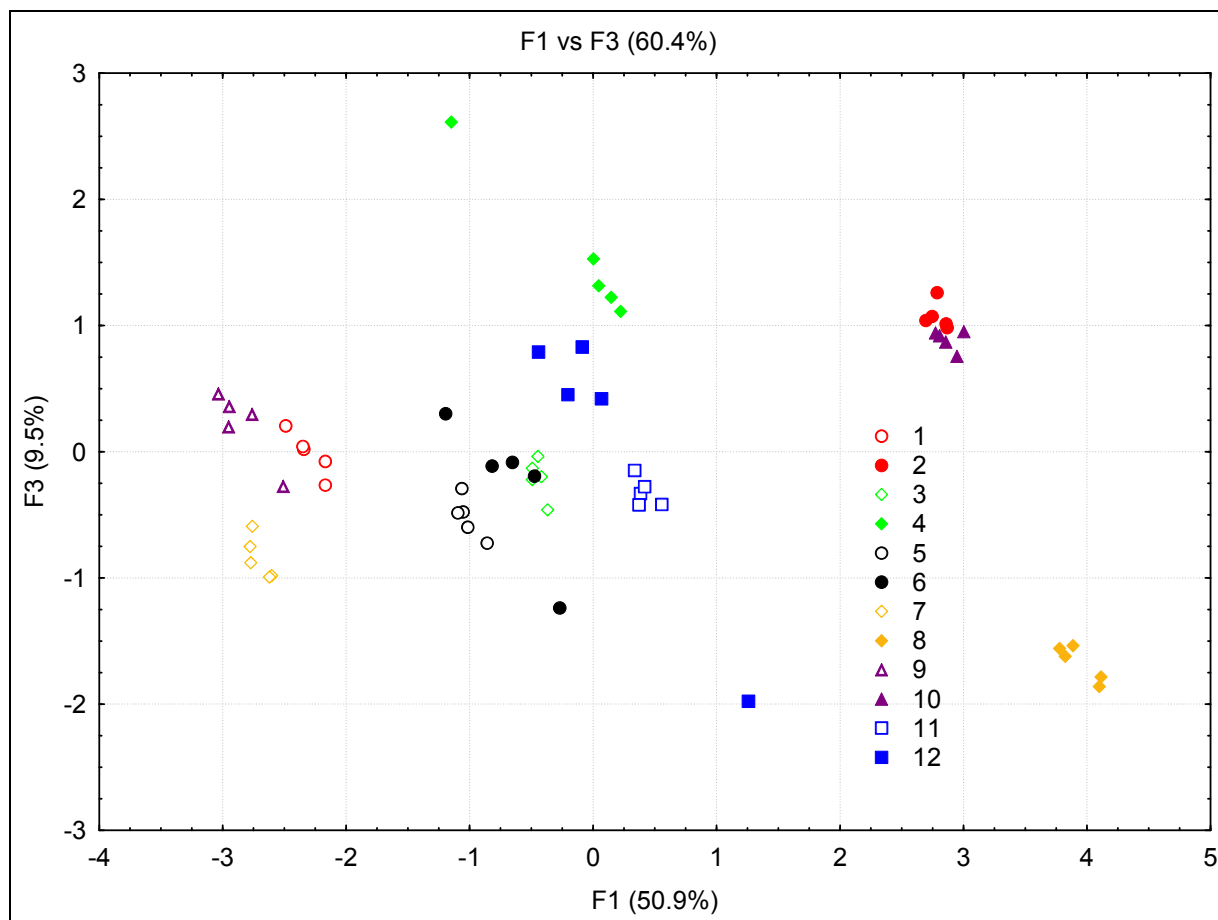

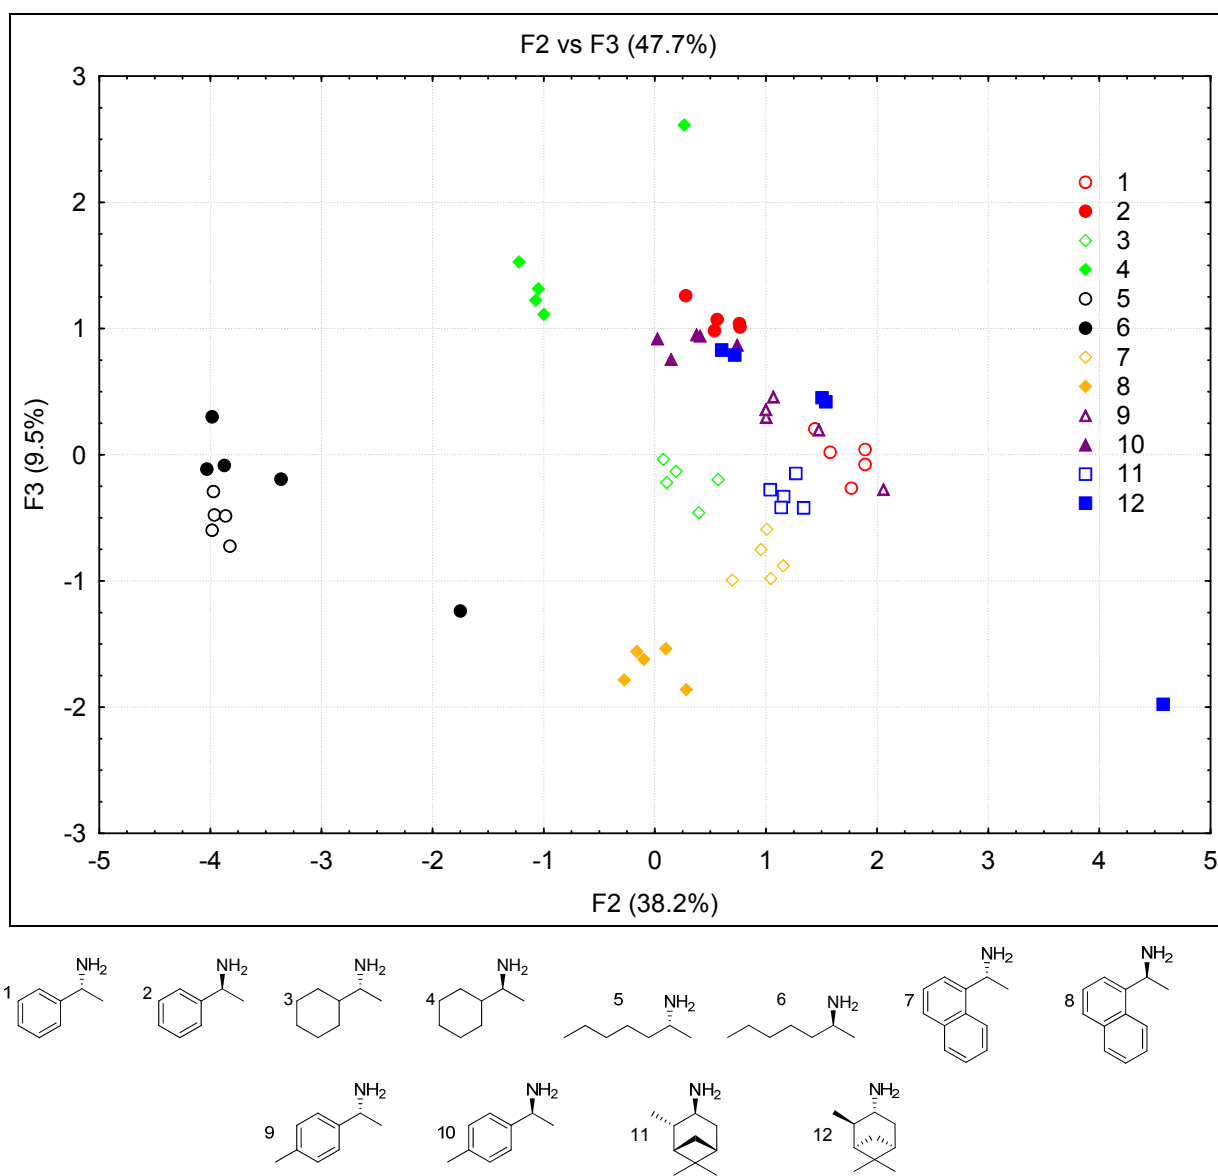

Figure S3. 2D PCA plots
